# Supplementary material for: Consumption of Different Egg-Based Diets Alters Clinical Metabolic and Hematological Parameters in Young, Healthy Men and Women
Source: MDPI journal article supplement (doi:10.3390/nu15173747), 2023-08-27
Supplement: s1 [file s1]

**Table S1.** Baseline characteristics of study participants

| Baseline Characteristics                     |             |
|----------------------------------------------|-------------|
| Age (years)                                  | 21.7 ± 4.7  |
| Sex                                          |             |
| Male (n)                                     | 5           |
| Female (n)                                   | 21          |
| BMI (kg/m <sup>2</sup> )                     | 22.5 ± 2.8  |
| Body fat percentage (%)                      | 24.8 ± 7.1  |
| Physical activity (min/day)                  | 78.7 ± 59.8 |
| Smoking (n)                                  |             |
| Yes                                          | 2           |
| No                                           | 24          |
| Medications (n)                              |             |
| Combined oral contraceptives (birth control) | 13          |
| Mood stabilizers                             | 5           |
| Asthma                                       | 3           |
| Allergy                                      | 2           |
| Beta blockers                                | 2           |
| Acne treatment                               | 1           |
| Laxative                                     | 1           |
| Dietary Supplements (n)                      |             |
| Multivitamin                                 | 7           |
| Iron                                         | 1           |
| Vitamin C                                    | 1           |
| Probiotic                                    | 1           |

Data are presented as mean ± standard deviation or total number of participants (n). n = 26.

**Table S2.** Average dietary intake of food groups across diet periods.

| <b>Food Group (servings per day)</b> | <b>Egg-free diet</b>     | <b>Egg white diet</b>    | <b>Whole egg diet</b>    |
|--------------------------------------|--------------------------|--------------------------|--------------------------|
| Vegetables                           | 2.91 ± 1.75              | 3.32 ± 1.76              | 3.21 ± 2.51              |
| Fruits                               | 1.32 ± 1.23              | 1.00 ± 0.89              | 1.18 ± 1.03              |
| Grains                               | 8.34 ± 7.39              | 5.75 ± 2.30              | 6.52 ± 3.48              |
| Dairy                                | 2.03 ± 1.34              | 1.97 ± 1.41              | 2.08 ± 1.26              |
| Protein foods                        | 4.54 ± 2.72 <sup>a</sup> | 6.51 ± 3.59 <sup>b</sup> | 7.16 ± 3.56 <sup>b</sup> |
| Oils                                 | 2.62 ± 1.46 <sup>a</sup> | 3.72 ± 2.32 <sup>b</sup> | 4.48 ± 2.22 <sup>b</sup> |

Data are presented as mean ± standard deviation, n = 26. Values with different letters (a, b) are significantly different at  $p < 0.05$ .

**Table S3.** Serum lipoprotein profiles following egg diet periods.

|                                   | <b>Egg-free diet</b> | <b>Egg white diet</b> | <b>Whole egg diet</b> | <b><i>p</i>-value</b> |
|-----------------------------------|----------------------|-----------------------|-----------------------|-----------------------|
| Total TRLP particles, nmol/L      | 83.8 ± 33.0          | 91.2 ± 57.0           | 85.5 ± 55.5           | 0.824                 |
| Average TRLP particle size, nm    | 48.1 ± 8.6           | 48.8 ± 7.9            | 48.1 ± 6.6            | 0.896                 |
| Very large TRLP, nmol/L           | 0.14 ± 0.18          | 0.20 ± 0.20           | 0.17 ± 0.11           | 0.463                 |
| Large TRLP, nmol/L                | 1.7 ± 1.9            | 1.1 ± 1.1             | 1.5 ± 1.9             | 0.494                 |
| Medium TRLP, nmol/L               | 16.9 ± 10.4          | 16.5 ± 12.4           | 18.9 ± 13.3           | 0.556                 |
| Small TRLP, nmol/L                | 20.1 ± 23.7          | 10.8 ± 10.6           | 14.8 ± 18.1           | 0.116                 |
| Very Small TRLP, nmol/L           | 45.0 ± 31.9          | 62.6 ± 54.3           | 50.1 ± 48.5           | 0.379                 |
| Total LDL particles, nmol/L       | 1,144.7 ± 275.1      | 1,176.0 ± 272.7       | 1,213.8 ± 230.7       | 0.190                 |
| Average LDL particle size, nm     | 21.5 ± 0.3           | 21.4 ± 0.5            | 21.4 ± 0.4            | 0.326                 |
| Large LDL, nmol/L                 | 478.6 ± 126.8        | 461.4 ± 181.2         | 492.1 ± 165.2         | 0.737                 |
| Medium LDL, nmol/L                | 422.9 ± 203.9        | 381.4 ± 204.9         | 362.6 ± 244.0         | 0.388                 |
| Small LDL, nmol/L                 | 243.2 ± 148.3        | 333.2 ± 280.8         | 359.1 ± 231.9         | 0.189                 |
| Total HDL particle number, µmol/L | 20.2 ± 2.4           | 20.6 ± 2.7            | 20.8 ± 3.3            | 0.482                 |
| Average HDL particle size, nm     | 9.3 ± 0.4            | 9.3 ± 0.4             | 9.3 ± 0.3             | 0.629                 |
| Large HDL, µmol/L                 | 2.2 ± 1.4            | 2.5 ± 1.4             | 2.6 ± 1.6             | 0.244                 |
| Medium HDL, µmol/L                | 6.5 ± 2.8            | 6.0 ± 2.8             | 6.1 ± 2.6             | 0.435                 |
| Small HDL, µmol/L                 | 11.5 ± 2.6           | 12.2 ± 2.9            | 12.1 ± 3.0            | 0.475                 |
| Serum apoB, mg/dL                 | 67.4 ± 15.5          | 68.1 ± 15.2           | 69.9 ± 12.3           | 0.483                 |
| Serum apoA1, mg/dL                | 137.3 ± 20.8         | 140.4 ± 21.9          | 143.9 ± 25.7          | 0.189                 |

Data are reported as mean ± standard deviation, n = 25. ApoA-1: apolipoprotein A-1; apoB: apolipoprotein B; TRLP: triglyceride-rich lipoprotein.

**Table S4.** Clinical immune profiles following egg diet periods.

|                                  | <b>Egg-free diet</b> | <b>Egg white diet</b> | <b>Whole egg diet</b> | <b><i>p</i>-value</b> |
|----------------------------------|----------------------|-----------------------|-----------------------|-----------------------|
| Total WBC,1000 cells/ $\mu$ l    | 5.81 $\pm$ 1.15      | 5.53 $\pm$ 1.24       | 5.68 $\pm$ 1.33       | 0.521                 |
| Neutrophils, 1000 cells/ $\mu$ l | 3.17 $\pm$ 1.06      | 3.01 $\pm$ 0.97       | 2.97 $\pm$ 1.04       | 0.591                 |
| Lymphocytes, 1000 cells/ $\mu$ l | 2.01 $\pm$ 0.47      | 1.88 $\pm$ 0.40       | 2.04 $\pm$ 0.44       | 0.255                 |
| Monocytes, 1000 cells/ $\mu$ l   | 0.48 $\pm$ 0.10      | 0.45 $\pm$ 0.13       | 0.49 $\pm$ 0.11       | 0.234                 |
| Eosinophils, 1000 cells/ $\mu$ l | 0.15 $\pm$ 0.10      | 0.20 $\pm$ 0.29       | 0.14 $\pm$ 0.07       | 0.340                 |
| Basophils, 1000 cells/ $\mu$ l   | 0.04 $\pm$ 0.02      | 0.04 $\pm$ 0.02       | 0.05 $\pm$ 0.02       | 0.743                 |
| % Neutrophils, % of total WBC    | 53.4 $\pm$ 8.8       | 53.1 $\pm$ 8.9        | 50.9 $\pm$ 7.6        | 0.415                 |
| % Lymphocytes, % of total WBC    | 34.4 $\pm$ 7.2       | 34.6 $\pm$ 6.5        | 36.5 $\pm$ 6.8        | 0.391                 |
| % Monocytes, % of total WBC      | 8.4 $\pm$ 2.0        | 8.3 $\pm$ 2.0         | 8.8 $\pm$ 1.5         | 0.365                 |
| % Eosinophils, % of total WBC    | 2.7 $\pm$ 2.3        | 3.7 $\pm$ 4.9         | 2.6 $\pm$ 1.4         | 0.259                 |
| % Basophils, % of total WBC      | 0.7 $\pm$ 0.3        | 0.8 $\pm$ 0.3         | 0.8 $\pm$ 0.3         | 0.600                 |
| Neutrophil:lymphocyte ratio      | 1.70 $\pm$ 0.82      | 1.61 $\pm$ 0.52       | 1.49 $\pm$ 0.51       | 0.485                 |
| Lymphocyte:monocyte ratio        | 4.30 $\pm$ 1.29      | 4.41 $\pm$ 1.10       | 4.28 $\pm$ 1.05       | 0.866                 |

Data are reported as mean  $\pm$  standard deviation. WBC: white blood cells.
